## What Risk Factors to Cause Long COVID and Its Impact on Patient Survival Outcomes when Combined with the Effect from Organ Transplantation in the Acute COVID

Ahmed N Nyandemoh<sup>1</sup> MPH, Jerrod Anzalone<sup>2</sup> MPH, Hongyin Dai<sup>1</sup> Ph.D, Roslyn Mannon<sup>3</sup> MD, and Jianghu (James) Dong<sup>1,3,\*</sup> Ph.D

- 1 Department of Biostatistics, College of Public Health, University of Nebraska Medical Center
- 2 Department of Neurological Sciences, University of Nebraska Medical Center
- 3 Division of Nephrology, Department of Internal Medicine, University of Nebraska Medical Center

### \*Corresponding Author:

Jianghu (James) Dong, Ph.D.

Department of Biostatistics, College of Public Health

University of Nebraska Medical Center

984375 Nebraska Medical Center, Omaha, NE 68198-4375

p: 402.559.1976 | f: 402.559.4961

Jianghu.dong@unmc.edu

### **Withdrawal statement**

medRxiv has withdrawn this preprint owing to lack of consent from all listed authors. Therefore, this work should not be cited as a reference for this project.
